# Supplementary material for: Volatile organic compound gas sensors based on methylammonium lead iodide perovskite operating at room temperature
Source: Royal Society of Chemistry journal article supplement (doi:10.1039/c9ra10703g), 2020-01-01
Supplement: c9ra10703g1.pdf [file c9ra10703g1.pdf]

Electronic supplementary Information

## Volatile organic compound sensor based on methylammonium lead halide perovskite operating at room temperature

Anafi Nur'aini <sup>a</sup> and Ilwhan Oh <sup>\*b</sup>

[\\*ioh@kumoh.ac.kr](mailto:*ioh@kumoh.ac.kr)

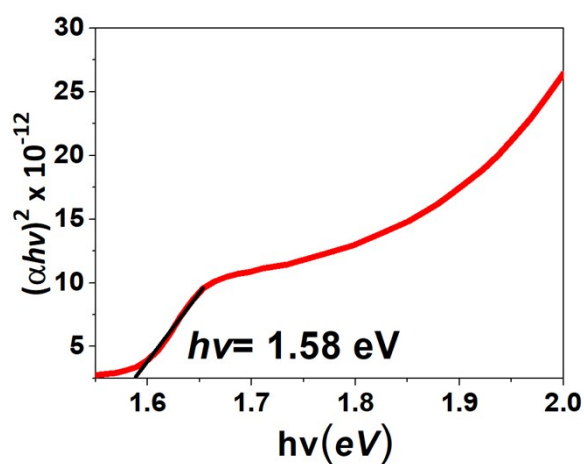

**Fig. S1**  $(\alpha hv)^2$  vs  $h\nu$  graph of 0.5 M MAPbI<sub>3</sub>. Absorption coefficient ( $\alpha$ ) = absorbance/ $d$ . In this case, the thickness of film ( $d$ ) of 0.5 M MAPbI<sub>3</sub> is 100 nm. Energy ( $h\nu$ ) can be calculated by  $E = hc/\lambda$ , where  $h$  is planks constant ( $4.13 \times 10^{-15}$  eV sec),  $c$  is velocity of light ( $3 \times 10^8$  m/s) and  $\lambda$  is wavelength.

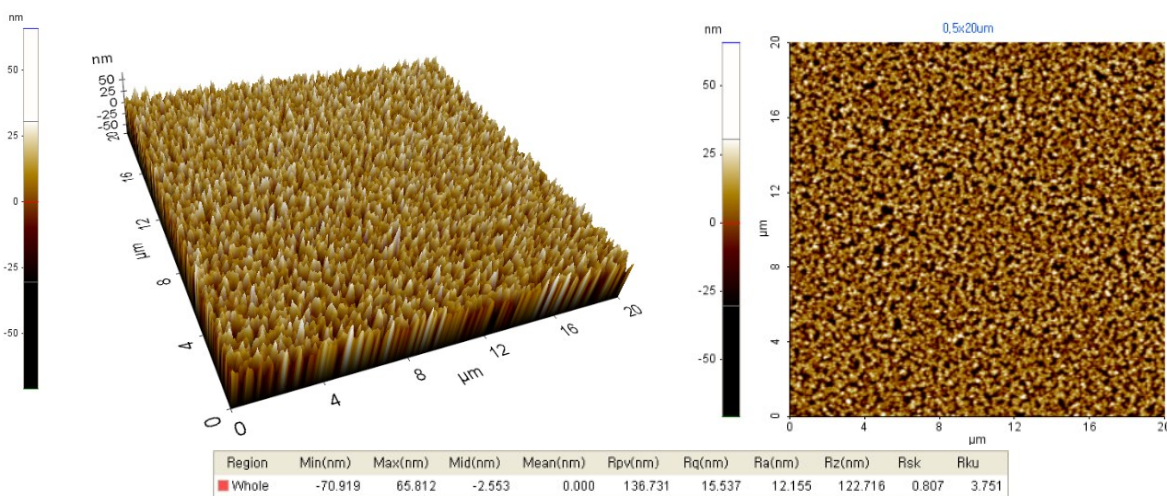

**Fig. S2** Atomic force measurement (AFM) images of 0.5 M MAPbI<sub>3</sub> film.

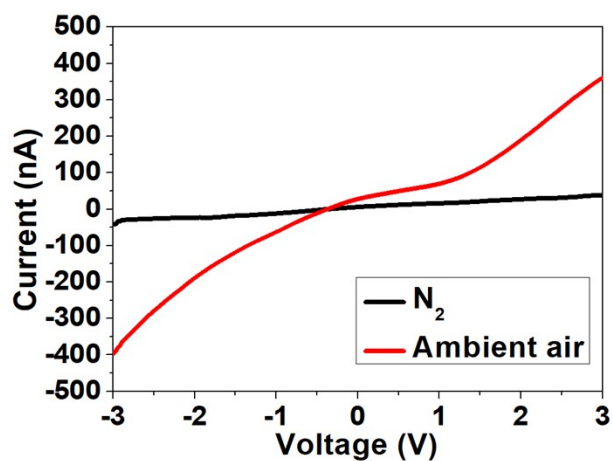

Fig. S3 I-V curve of MAPbI<sub>3</sub> during exposure towards nitrogen and ambient air.

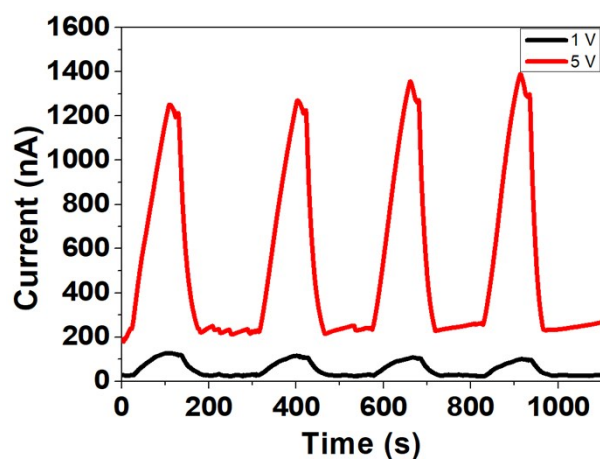

Fig S4 Current-time (I-t) graph of MAPbI<sub>3</sub> films under different applied bias (1 V and 5 V).

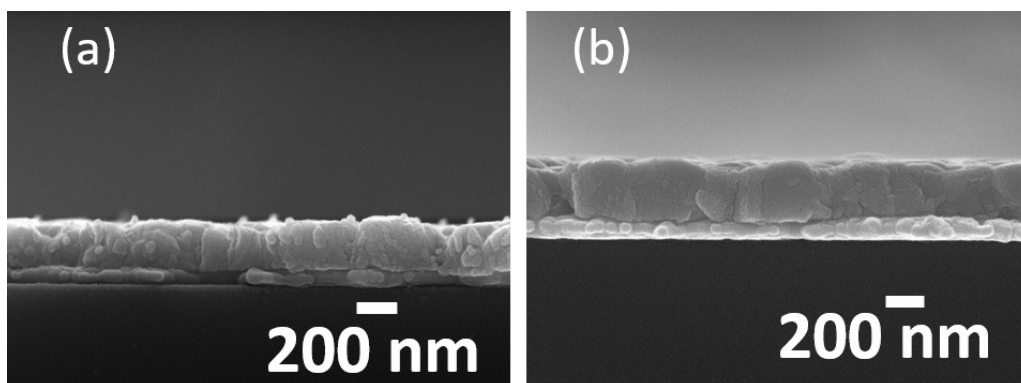

Fig. S5 Scanning electron microscope (SEM) images for cross section of (a) 1.0 M and (b) 1.5 M MAPbI<sub>3</sub> film.

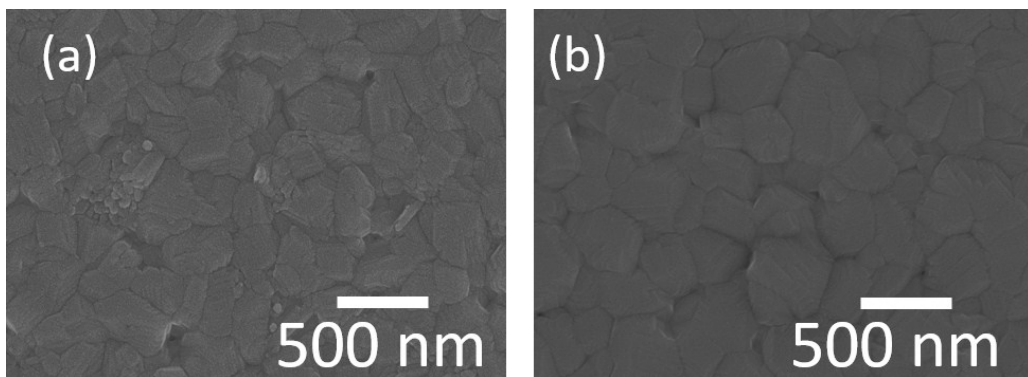

**Fig. S6** Scanning electron microscope (SEM) images for top-view of (a) 1.0 M and (b) 1.5 M MAPbI<sub>3</sub> film.

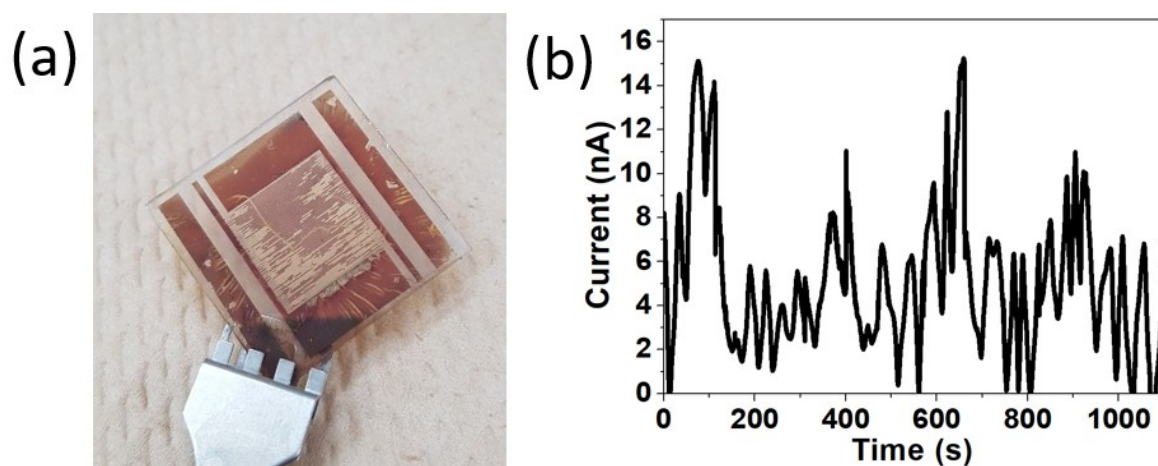

**Fig. S7** (a) Perovskite film on interdigitated electrode for 0.25 M MAPbI<sub>3</sub> (b) Current-time (I-t) graph of 0.25 M MAPbI<sub>3</sub> film towards ethanol (10,000 ppm).

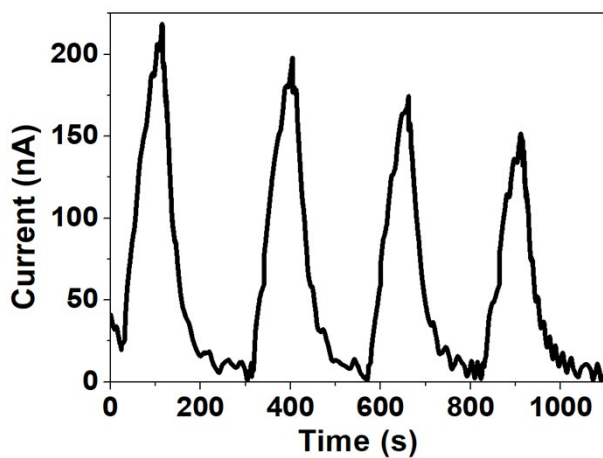

**Fig S8** Current-time (I-t) graph of MAPbI<sub>3</sub> films towards nail polish remover vapour.

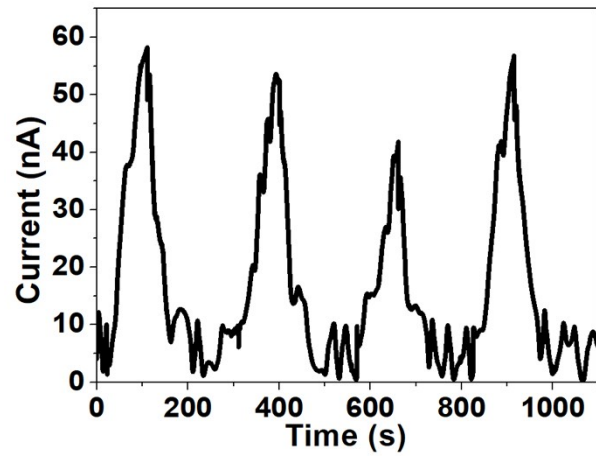

Fig S9 Current-time (I-t) graph of MAPbI<sub>3</sub> films towards soju vapour.
